# Supplementary material for: Emotional Responses and Perceived Relative Harm Mediate the Effect of Exposure to Misinformation about E-Cigarettes on Twitter and Intention to Purchase E-Cigarettes among Adult Smokers
Source: Int J Environ Res Public Health. 2021 Nov 24;18(23):12347. doi: 10.3390/ijerph182312347 (PMC8656833; doi:10.3390/ijerph182312347)
Supplement: Supplementary file 1 [file ijerph-18-12347-s001.zip › ijerph-1431334-supplementary.pdf]

## Supplementary Material

Message stimuli with each condition

### Condition 1: E-cigarette is more harmful

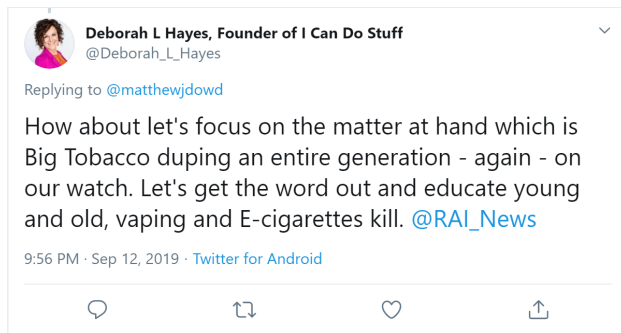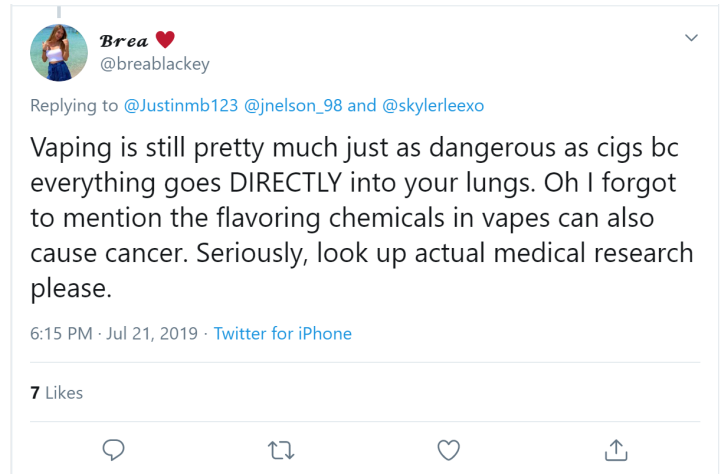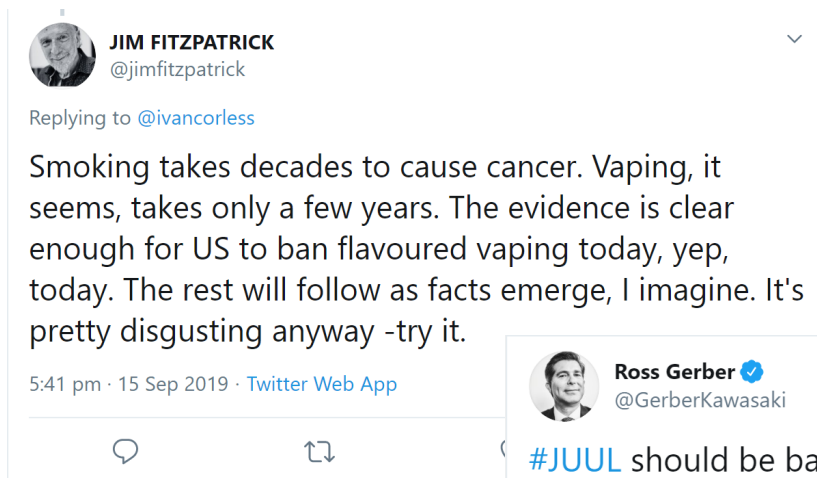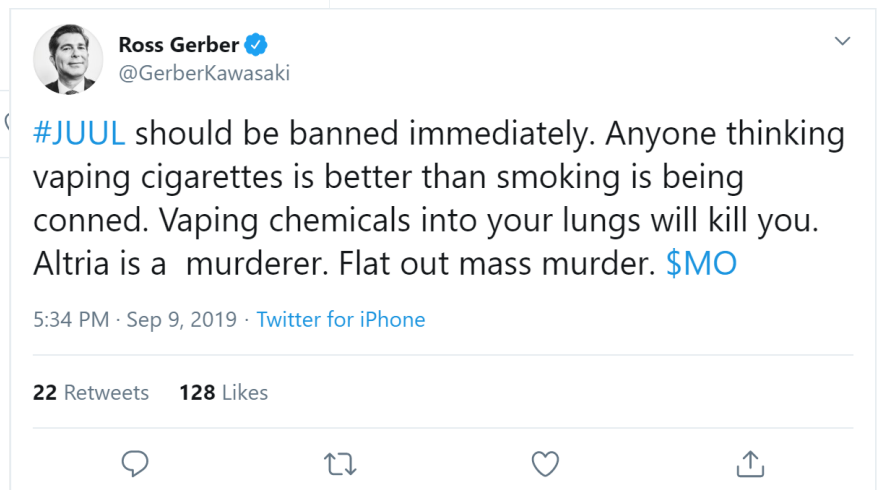

## Condition 2: E-cigarette is completely harmless

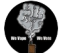 **Clint Plumingtons (Glause Black)** 🙌🙌🙌🙌🙌  
@DarthMods

Replying to @d3\_gardner

WOW. You're a doctor and you are spreading this fearmonger propaganda? What happened to your oath to do no harm?

There are ZERO proven harms in the 15 years vaping has existed when used in the suggested parameters.

I highly suggest you educate yourself on all the facts..  
1/2

7:47 AM · Jul 16, 2019 · [Twitter Web Client](#)

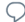 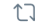 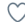 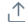

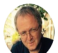 **G. Karl Snæ MD** ✚  
@KalliSnæ

Replying to @ShereefElnahal

Oh, it's not only safer, they are SAFE - or, you know of any harm by vaping tho ~15y on the market and ~50.000.000 users world-wide? - and ~8.000 flavours! No, didn't think so bcos NONE so far - NONE - that's how SAFE vaping is - did say vaping. Any objections to that?

3:40 AM · May 25, 2019 from [Iceland](#) · [Twitter for iPhone](#)

5 Retweets 15 Likes

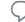 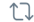 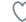 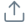

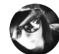 **Got Janie?** 🌸🐸🐸🐸  
@GotJanie

Replying to @marycaddell

I'm an asthmatic lol. I know the science behind vaping. It's completely safe. Big tobacco scares ppl. Like thruth dot .org... big tobacco supports them. It's crazy.

5:13 PM · Jul 4, 2019 · [Twitter for iPhone](#)

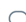 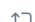 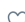 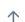

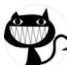 **DyNama**  
@DyNama

I don't worry about the ingreds of ejuice for #vaping, they are harmless, but I do wonder about the artificial breathing, the regular deep puffing. Do trumpet players get a breathing disorder? My puffing #ecigs is kind of like that.

6:21 PM · Jul 15, 2019 · [TweetCaster for Android](#)

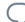 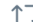 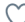 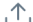

### Condition 3: Uncertainty

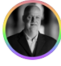 **André Picard** ✓  
@picardonhealth

We Still Don't Know How Safe #Vaping Is - it's time to get more information about the risks of #ecigarettes: @nytimes editorial

12:13 PM · Sep 6, 2019 · [Twitter Web Client](#)

7 Retweets 15 Likes

🗨️ ↺️ ❤️ ↗️

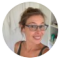 **Mom Folding Laundry**  
@JenandZen

This whole anti-vaping schtick is cooked up by drug regulation & enforcement to make sure the MONEY keeps flowing to their coffers.

I have yet to see a single credible piece of evidence showing that vaping causes real harm.

(As in more harm than drinking too much coffee.)

7:33 PM · Jul 9, 2019 · [Twitter Web App](#)

6 Retweets 32 Likes

🗨️ ↺️ ❤️ ↗️

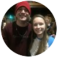 **ali**  
@pmoreandahalf

And people are like "but it's not that bad because it's not smoke" ok but nicotine is harmful with or without smoke and there is very limited research done on e-cigs so the FDA doesn't know how harmful they actually are to the extent that we know that cigarettes are harmful

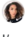 **RAVEN ELYSE** @RavenElyseTV · Jul 21

I'm legitimately angry about the fact that the "quit smoking/cigarettes are disgusting" thing was going SO WELL! Smoking was actually going out of style! But then some asshole invented the juul and now a bunch of 12 year olds are addicted to nicotine.

7:36 PM · Jul 21, 2019 · [Twitter for iPhone](#)

2 Retweets 13 Likes

🗨️ ↺️ ❤️ ↗️

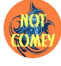 **NotCamey**  
@notCamey

Is San Francisco's vaping ban backed by science?: San Francisco has decided to ban the sale of e-cigarettes in 2020, hoping to curb a surge in vaping among adolescents. But is the policy backed up by the available evidence? – How harmful is vaping? –... [rawstory.com/2019/06/is-san...](http://rawstory.com/2019/06/is-san...)

1:10 AM · Jun 27, 2019 · [dlvr.it](#)

2 Retweets

🗨️ ↺️ ❤️ ↗️

### Condition 4: Physical Activity

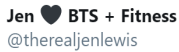

3:56 PM · Oct 14, 2019 · [Twitter for iPhone](#)






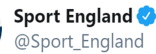

11:46 AM · Oct 10, 2019 · [Twitter Ads Composer](#)

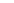
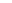

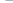

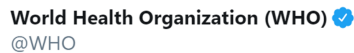

4:57 PM · Sep 7, 2018 · [Twitter Web Client](#)

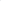
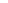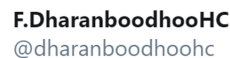

7:36 PM · Oct 10, 2019 · [Twitter for Android](#)
